# Supplementary material
Source: publisher figshare collection journal article supplement (https://acs.figshare.com/ndownloader/files/14835155)
Supplement: Supplementary file 1 [file 14835155]

## Supporting Information

### **Supported Cobalt Nanoparticles with a Single Active Phase for Fischer-Tropsch Synthesis**

*Shuai Lyu<sup>†¶</sup>, Bo Peng<sup>\*¶</sup>, Ting Kuang<sup>†</sup>, Kenneth G. Rappé<sup>‡</sup>, Yuhua Zhang<sup>‡</sup>, Jinlin Li<sup>‡</sup>,  
and Li Wang<sup>\*¶</sup>*

<sup>†</sup> Key Laboratory of Catalysis and Materials Science of the State Ethnic Affairs Commission & Ministry of Education, College of Chemistry and Materials Science, South-Central University for Nationalities, Wuhan 430074, China.

<sup>‡</sup> Institute for Integrated Catalysis, Pacific Northwest National Laboratory, 902 Battelle Boulevard, P. O. Box 999, Richland, WA 99352, USA.

### **Corresponding Author**

\*E-mail for B. P.: [peng761@pnnl.gov](mailto:peng761@pnnl.gov) (B. Peng).

\*E-mail for L. W.: [li.wang@mail.scuec.edu.cn](mailto:li.wang@mail.scuec.edu.cn) (L. Wang). Tel. +86 27 67842922.

### **Author Contributions**

<sup>¶</sup> These authors contributed equally.

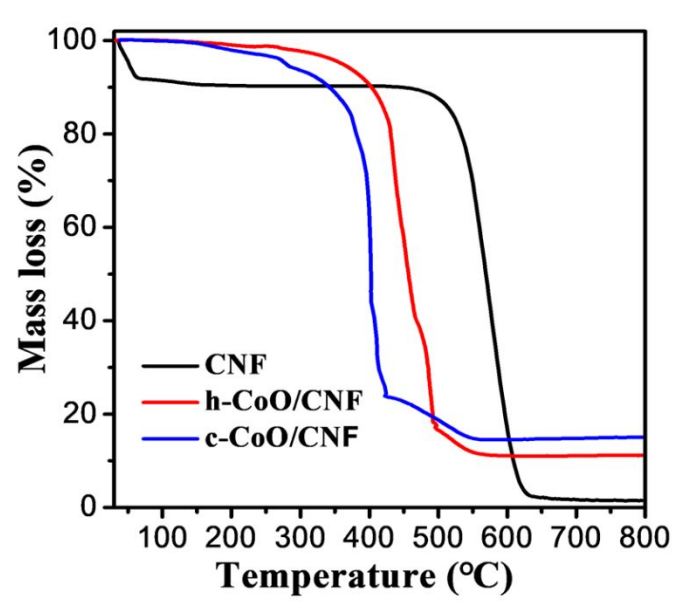

Figure S1. TGA profiles of CNF and CoO/CNF materials. The experiment was performed in air at a heating rate of 10 K min<sup>-1</sup>.

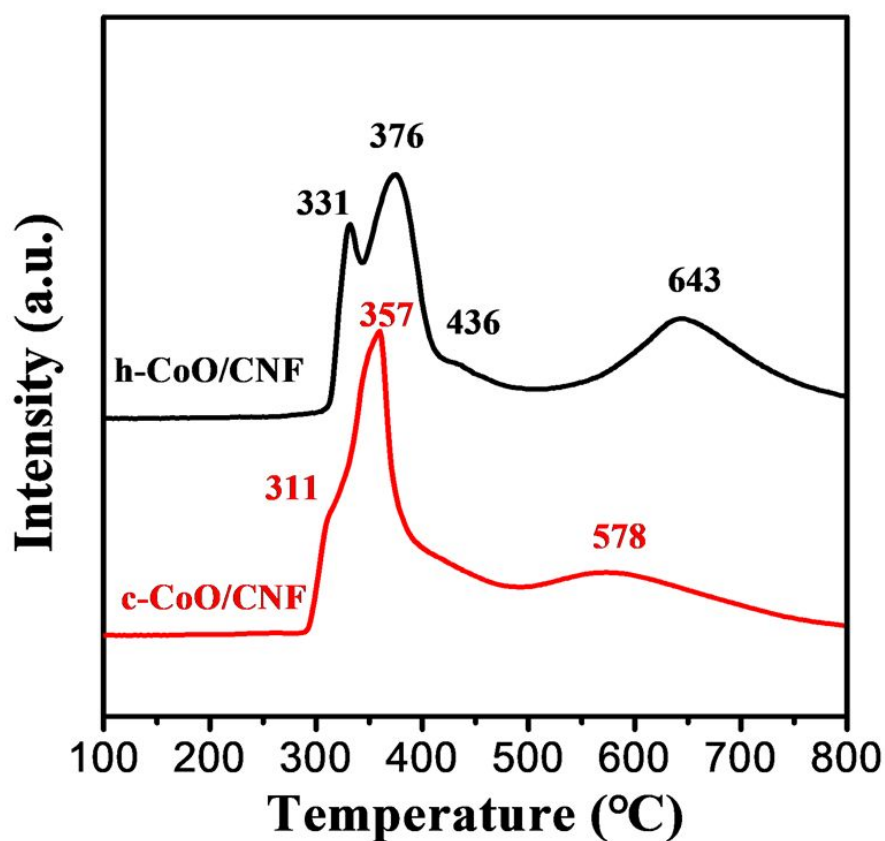

Figure S2. H<sub>2</sub>-TPR profile of h-CoO/CNF and c-CoO/CNF. Conditions: 50 mg of CoO, H<sub>2</sub>/Ar=1/9 (mol/mol), flow rate 30 mL min<sup>-1</sup>, temperature ramp 10 K min<sup>-1</sup>.

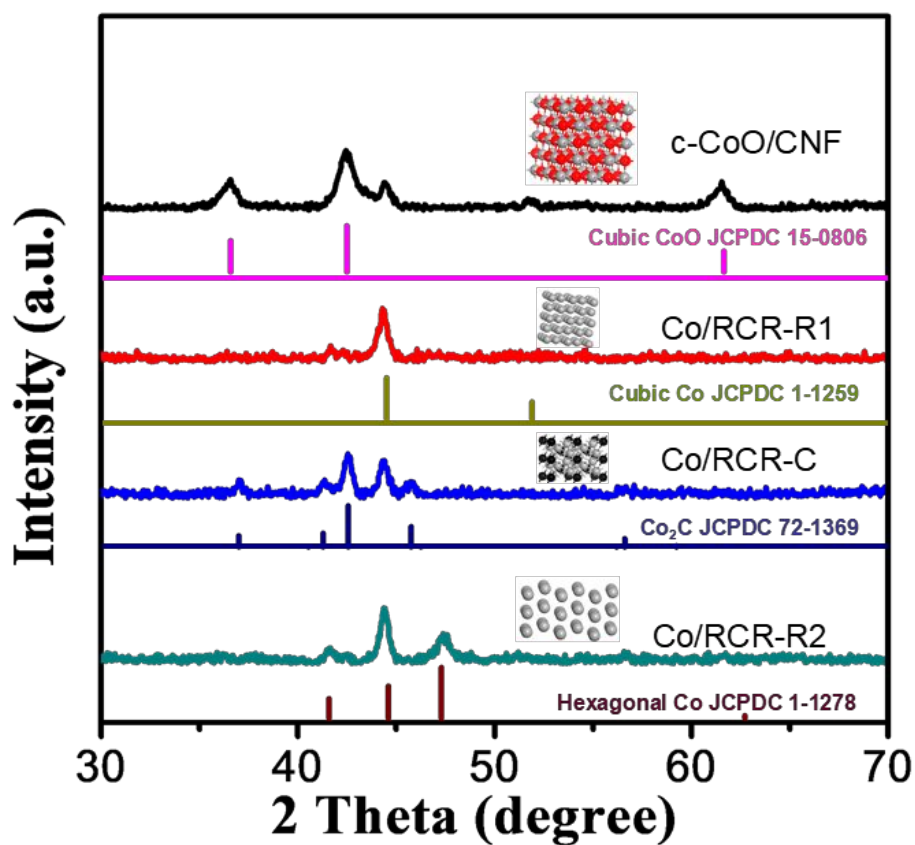

Figure S3 Phase evolution in reduction-carburization-reduction (RCR) process.

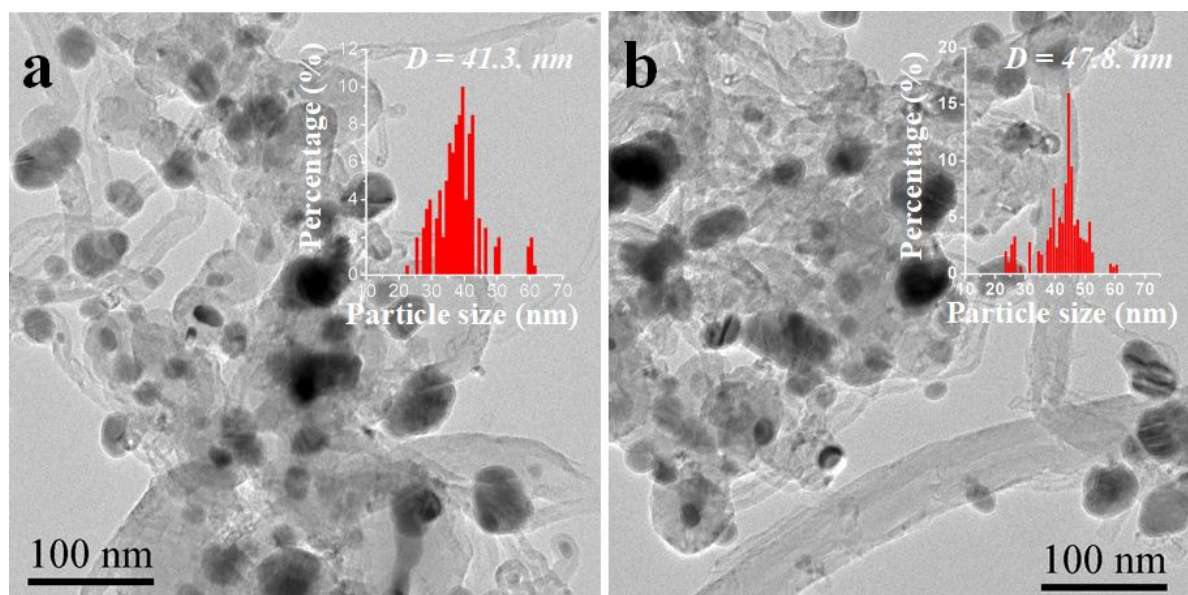

Figure S4. TEM and size distribution of (a) Co/RCR-C and (b) Co/RCR-R2 (size distribution is shown in the insets).

Table S1 Dispersion and cobalt particle size data of Co catalysts supported on the carbon nanofibers.

| Catalysts  | H <sub>2</sub> desorbed<br>(umol/g) | Dispersion<br>(%) | Cobalt particle size (nm)                 |                  |                  | Cobalt loading<br>(wt. %) |
|------------|-------------------------------------|-------------------|-------------------------------------------|------------------|------------------|---------------------------|
|            |                                     |                   | H <sub>2</sub> chemisorption <sup>a</sup> | TEM <sup>b</sup> | XRD <sup>c</sup> |                           |
| hcp-Co/CNF | 49.7                                | 3.3               | 17.4                                      | 23.1             | 18.6             | 6.2                       |
| fcc-Co/CNF | 82.8                                | 6.7               | 14.4                                      | 22.4             | 18.4             | 8.3                       |
| Co/RCR     | --                                  | --                | --                                        | 47.8             | --               | 8.3                       |

<sup>a</sup> The cobalt particle size calculated using the following equation:  $d = 0.96/\text{dispersion}$ .

<sup>b</sup> The surface-average cobalt particle size was obtained from TEM.

<sup>c</sup> The average cobalt particle size was determined by XRD (Scherrer equation) at  $2\theta=41.6^\circ$  for hcp-Co and  $2\theta=51.9^\circ$  for fcc-Co.

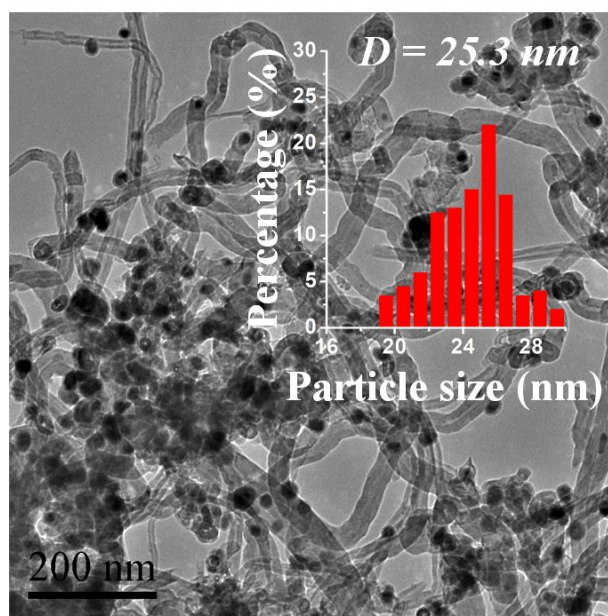

Figure S5 TEM image (the inset is size distribution) of fcc-Co/CNF catalyst after reaction.

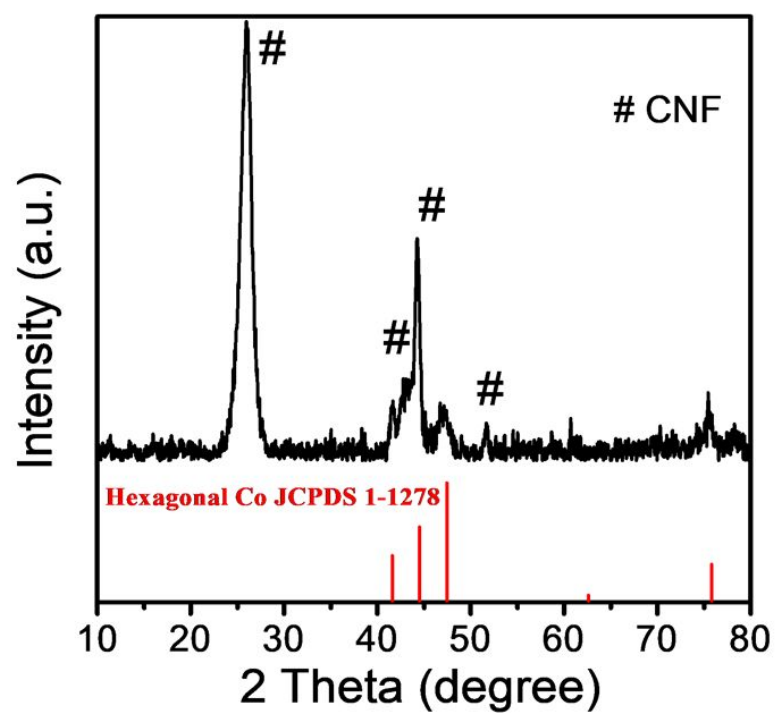

Figure S6 XRD pattern of hcp-Co/CNF catalyst after reaction.
